# Supplementary material
Source: PubMed Central journal article supplement (PMC196885)

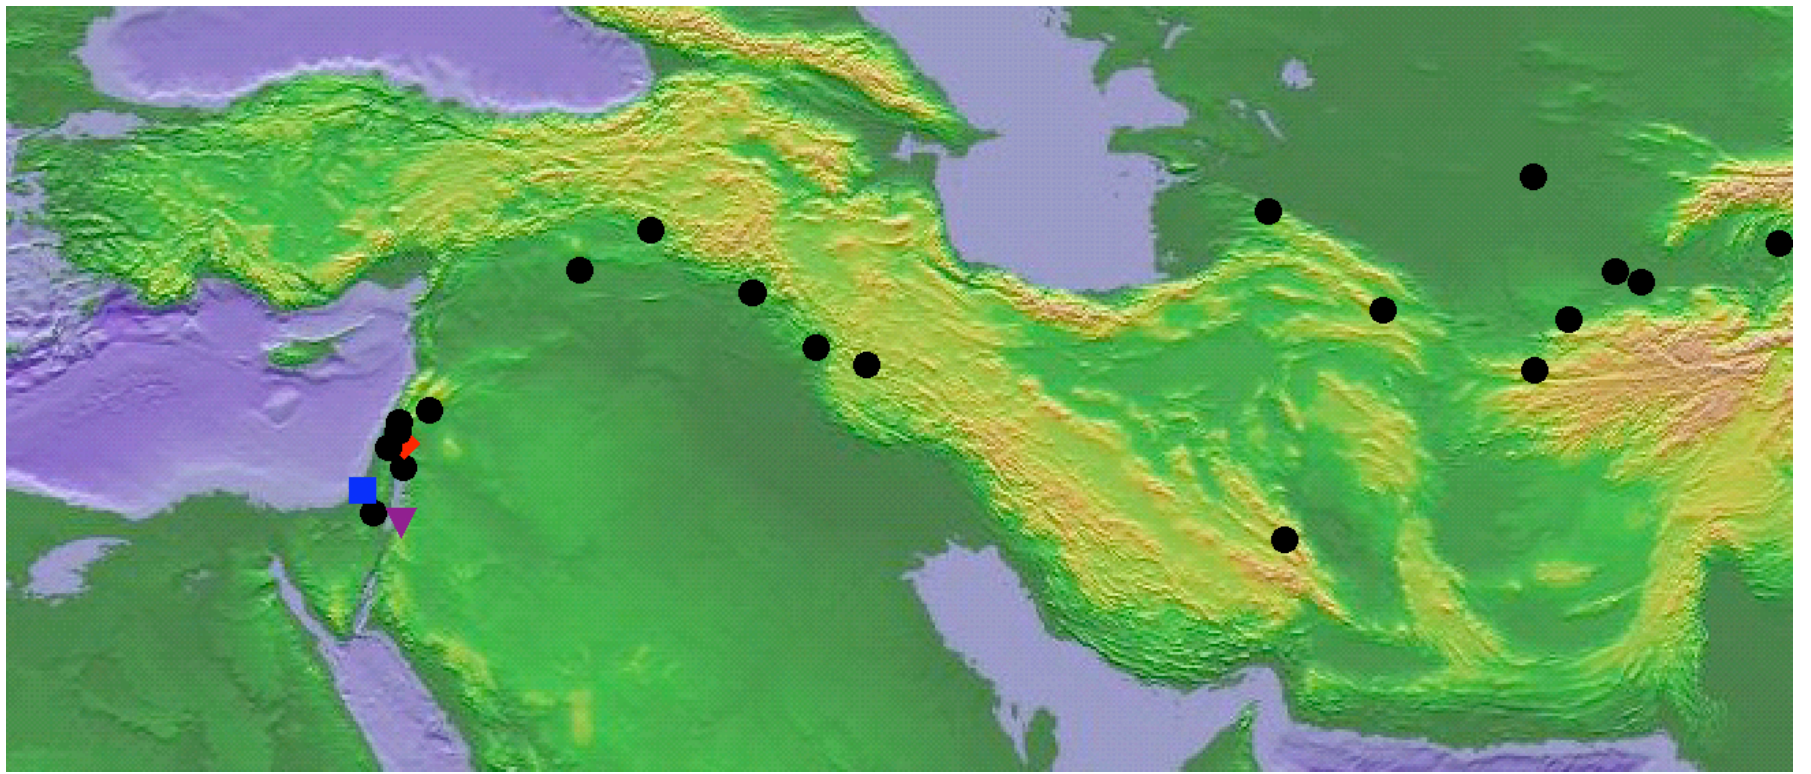

Supplement: pnas_100_19_10812__12.pdf [file pnas_100_19_10812__12.pdf]

- Western
- Zagros
- Eastern

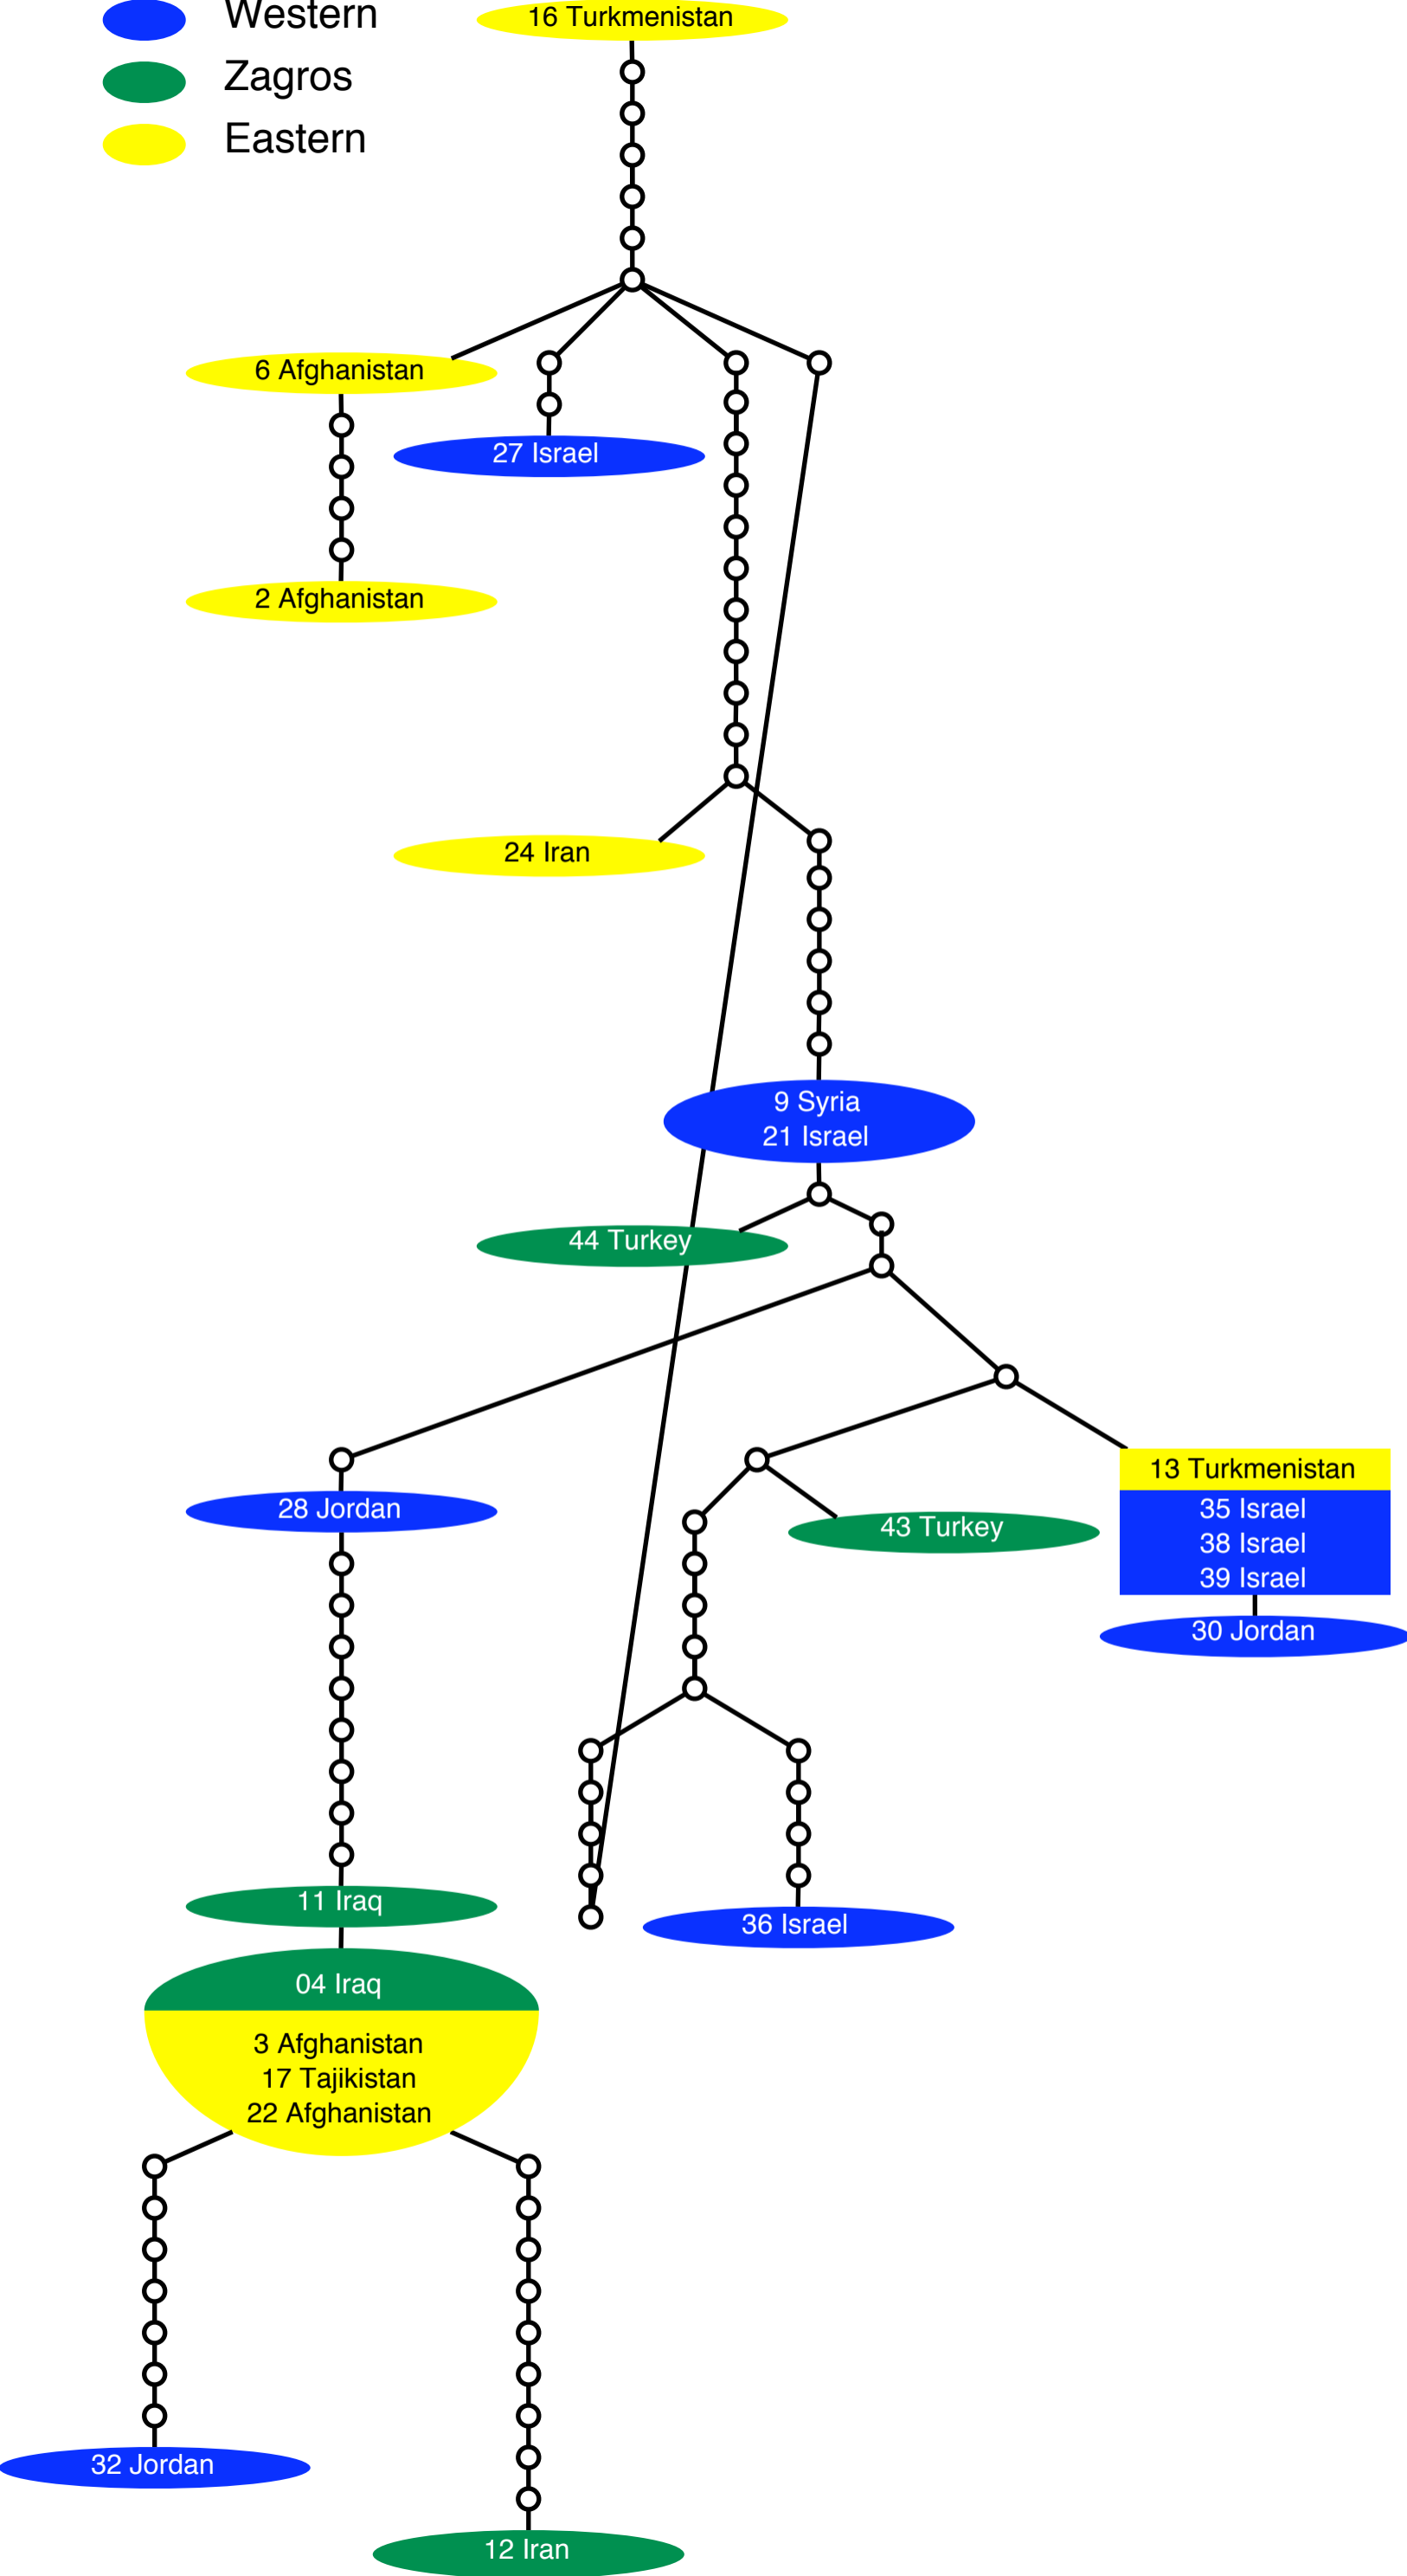

Supplement: pnas_100_19_10812__13.pdf [file pnas_100_19_10812__13.pdf]

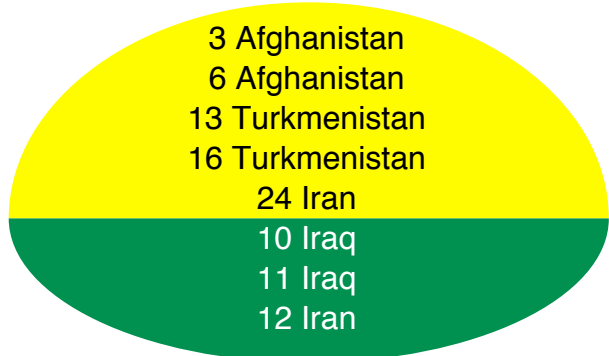

- Western
- Zagros
- Eastern

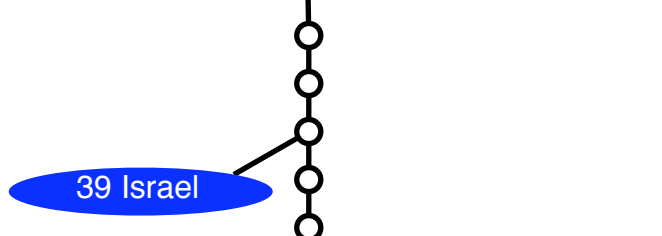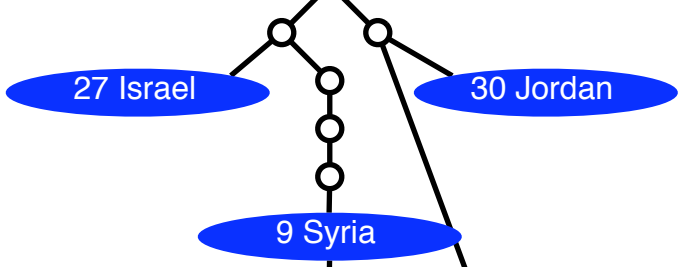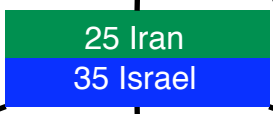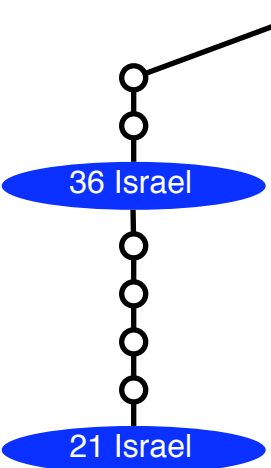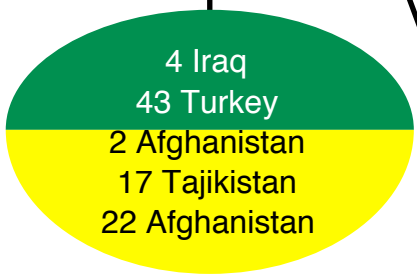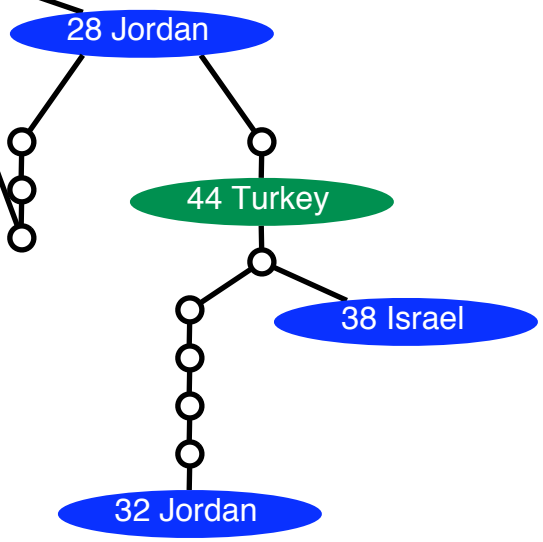

Supplement: pnas_100_19_10812__14.pdf [file pnas_100_19_10812__14.pdf]

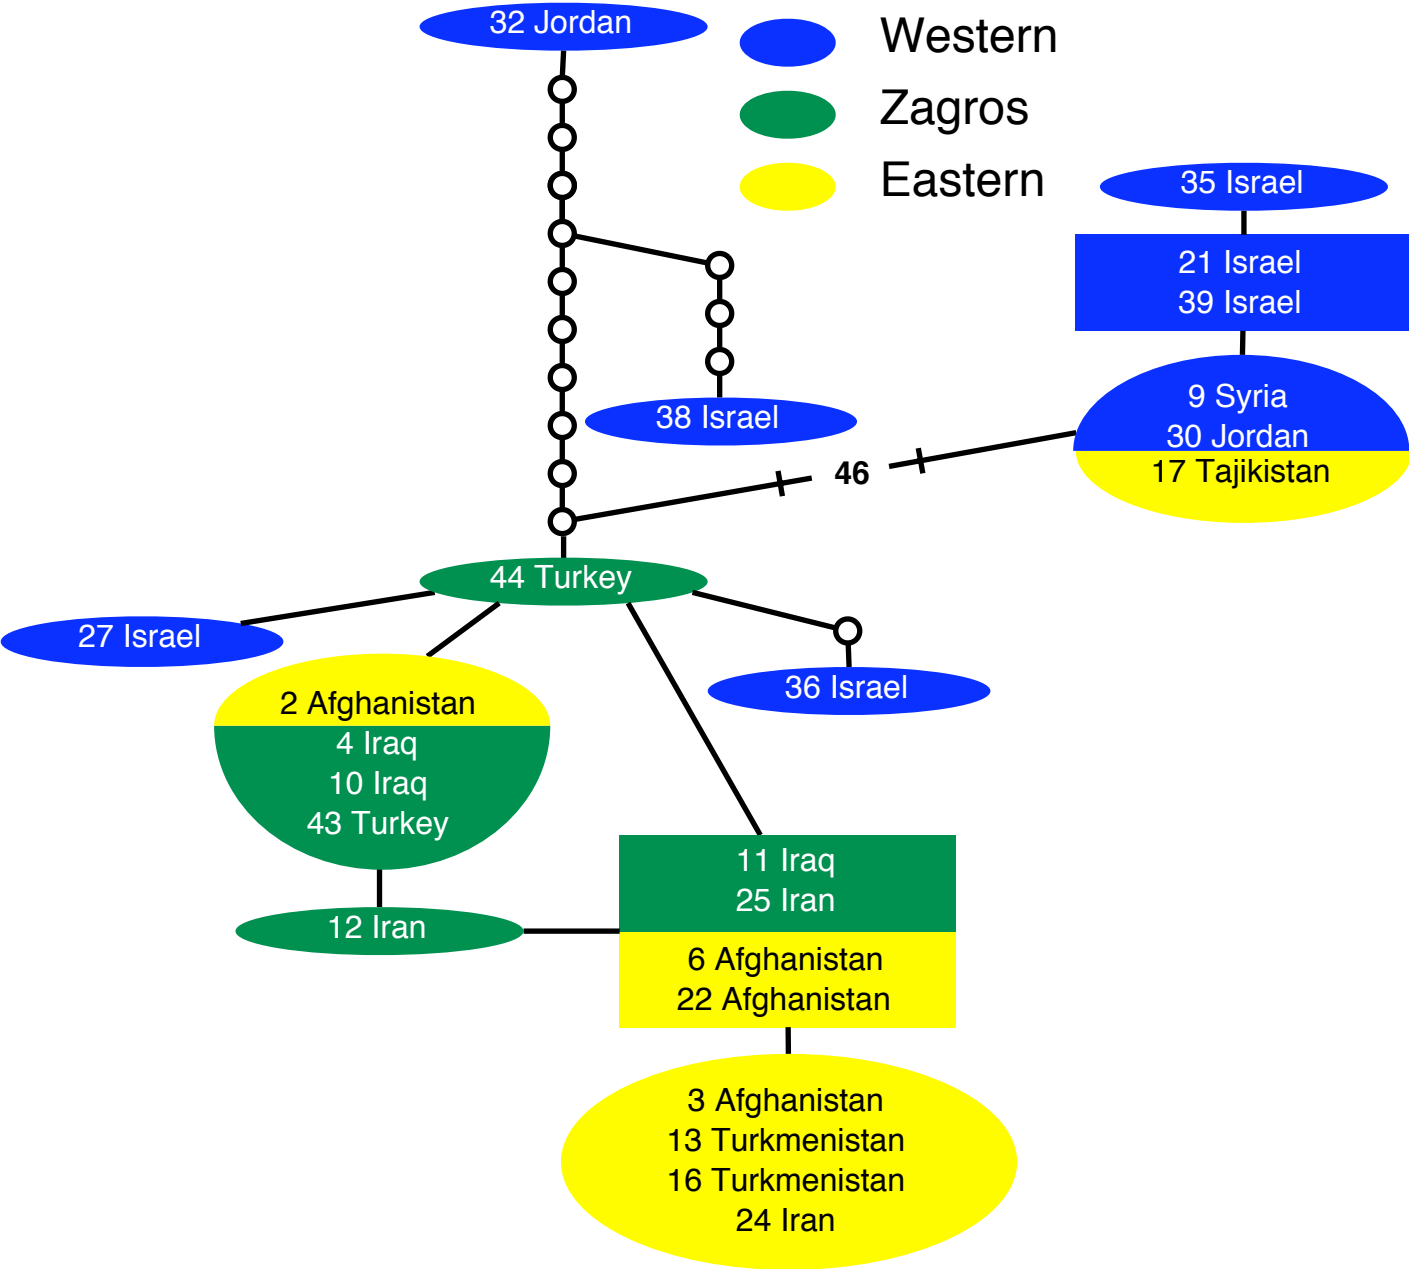

Supplement: pnas_100_19_10812__15.pdf [file pnas_100_19_10812__15.pdf]

- Western
- Zagros
- Eastern

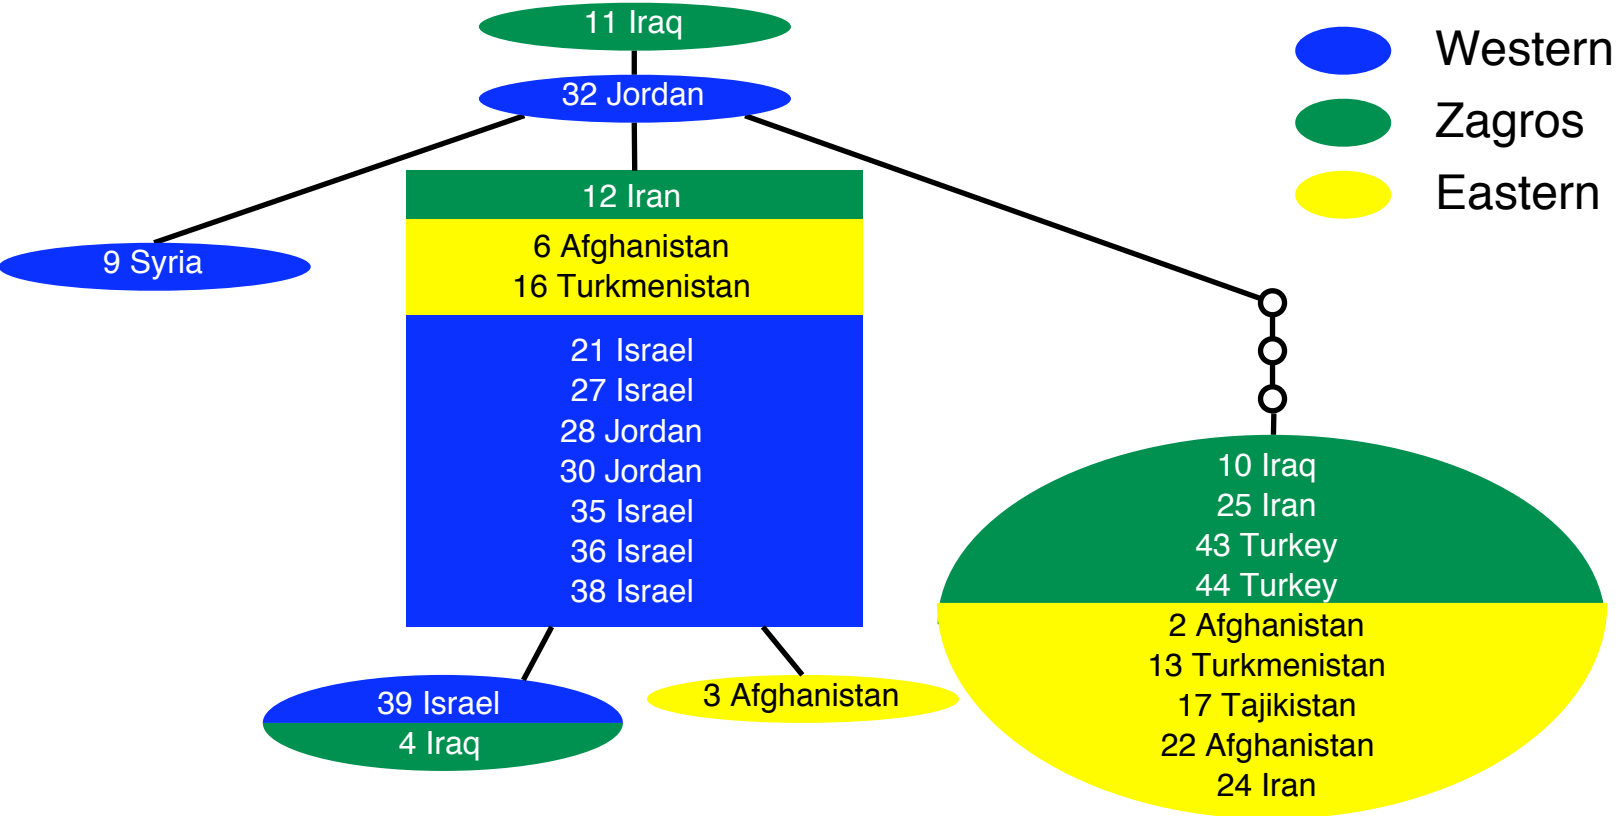

Supplement: pnas_100_19_10812__16.pdf [file pnas_100_19_10812__16.pdf]

- Western
- Zagros
- Eastern

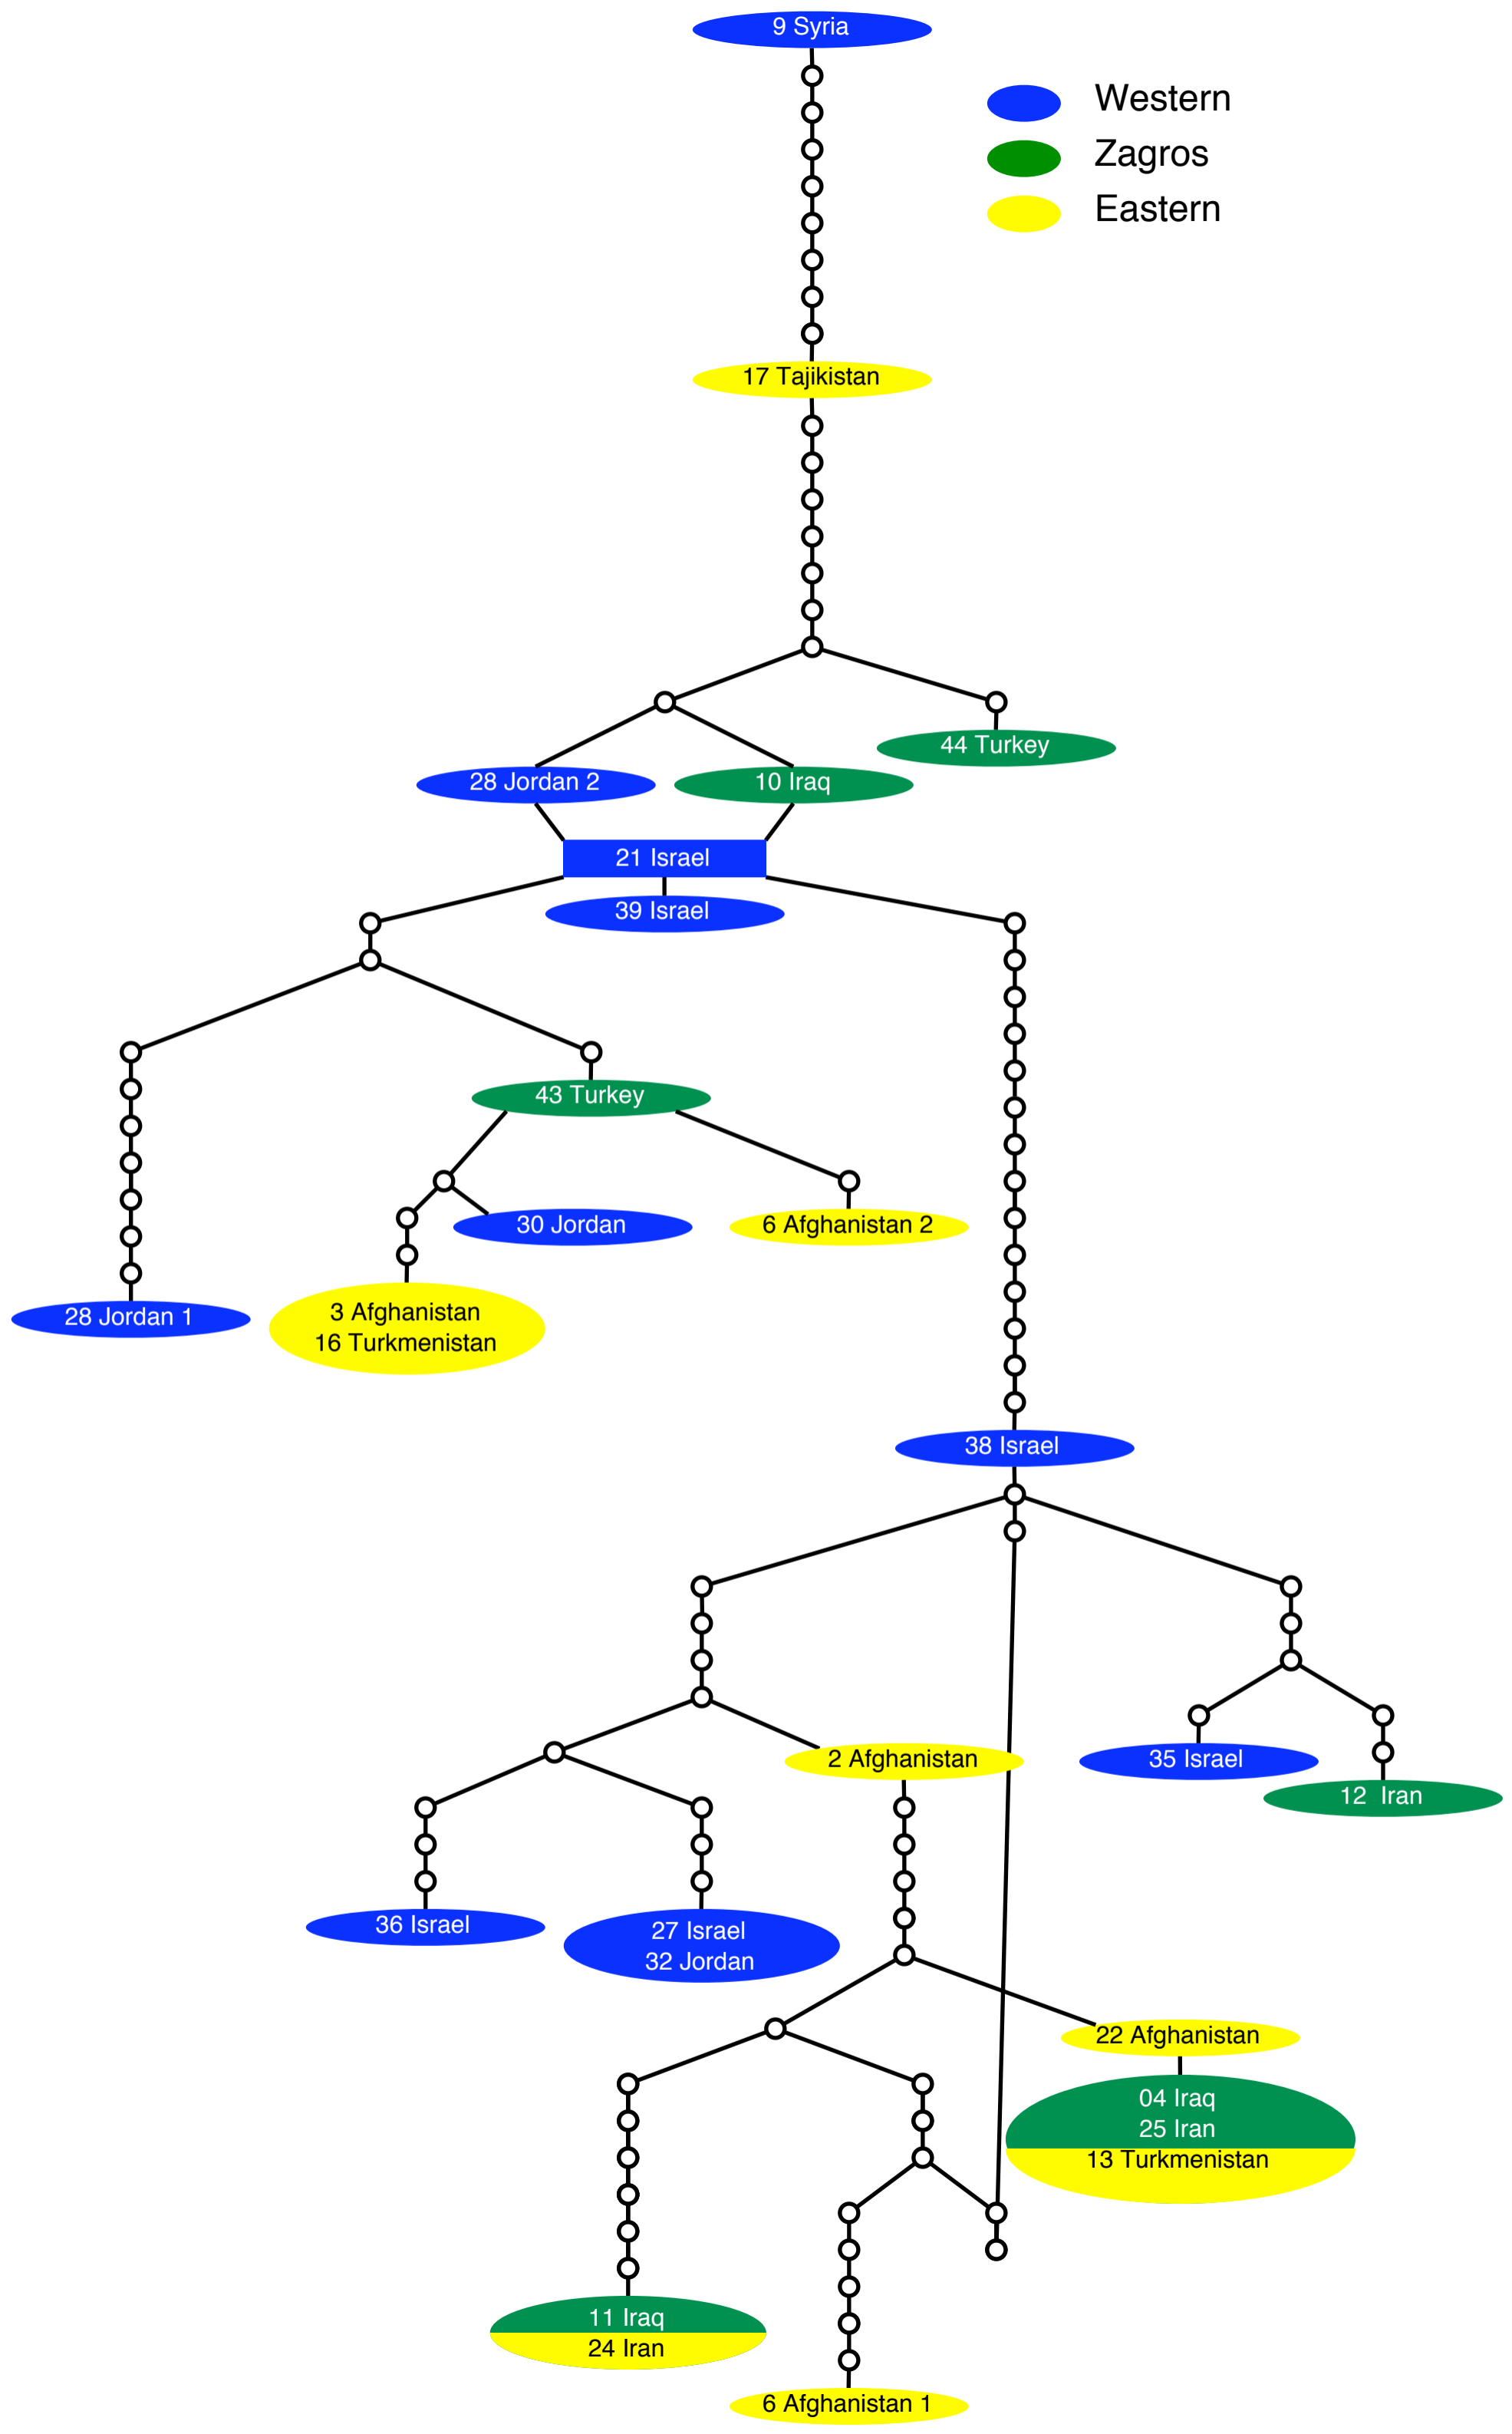

Supplement: pnas_100_19_10812__17.pdf [file pnas_100_19_10812__17.pdf]
